# Supplementary material
Source: Springer Nature journal article supplement (https://www.springermedizin.de/resource/supplementary/13054_2009_8332_MOESM2_ESM.pdf/9731728)

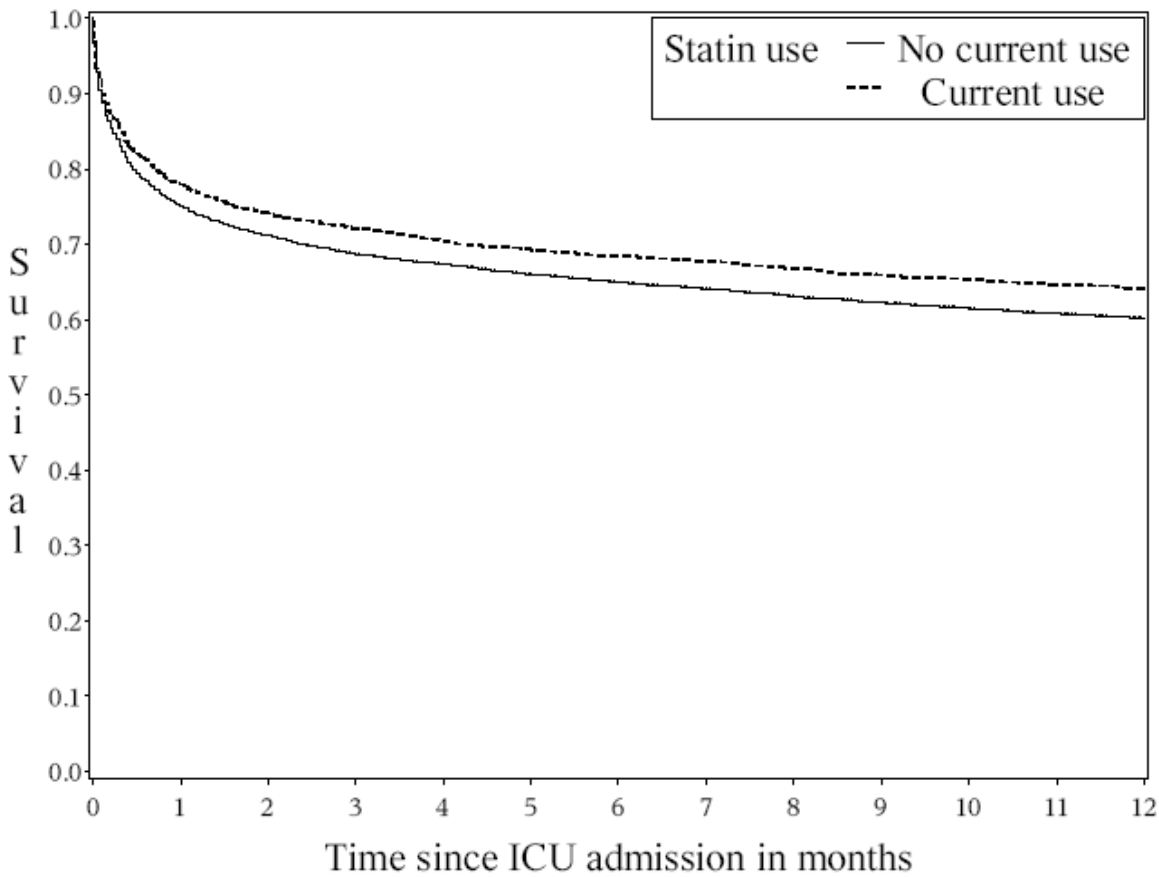

Supplement: MOESM2 [file 9731728]
